1 **Title:** Exposure to cough aerosols and development of pulmonary COVID-19

2 **Authors:** Koen Vanden Driessche M.D.<sup>1,2</sup>, Jeremy Nестele<sup>3</sup>, Jeroen Grouwels M.D.<sup>3</sup>, Els LIM  
3 Duval, M.D., Ph.D.<sup>4</sup>

4 **Author affiliations:** <sup>1</sup>Division of Pulmonology, Department of Pediatrics, <sup>3</sup>Division of Infectious  
5 Diseases, Department of Internal Medicine, and <sup>4</sup>Division of Pediatric Intensive Care,  
6 Department of Intensive Care, Antwerp University Hospital, Edegem, Belgium.

7 <sup>2</sup>Radboud Center for Infectious Diseases, Radboud University Medical Center, Nijmegen, The  
8 Netherlands.

9 **Corresponding author:** Koen Vanden Driessche, Department of Pediatrics, Antwerp University  
10 Hospital, Wilrijkstraat 10, 2650 Edegem, Belgium; Tel: +32 3 275 73 68; Fax: +32 3 829 11 94;  
11 email: [koen.vandendriessche@uza.be](mailto:koen.vandendriessche@uza.be)

12 **Authors' contributions:** KVD and ED conceived the study, analyzed the data, and drafted the  
13 manuscript. JG and JN collected the data and reviewed the manuscript. All authors approved  
14 the final version of the article.

15 **Source of funding:** Not applicable.

16 **Running head:** Cough aerosol exposure and pulmonary COVID-19

17 **Word count:** 873 (not including tables, figures, references)

18 **Abstract:** Half a year after the emergence of COVID-19, research is still going on to gain insight  
19 in the importance of different SARS-CoV-2 transmission routes and their impact on the clinical  
20 picture of COVID-19. Our findings suggest that coughing is not as important for transmission as  
21 initially anticipated and we discuss the potentially important role for loud conversation as a  
22 driver for transmission.

23 **Disclosure:** None of the authors have any financial associations or other possible conflicts of  
24 interest to declare.

25 **Keywords:** SARS-CoV-2, disease transmission, masks

## 26 **Introduction**

27 Six months after the emergence of SARS-CoV-2 the relative importance of its different  
28 transmission routes remains to be clarified. Respiratory viruses like SARS-CoV-2 are normally  
29 transmitted by contact (direct and/or indirect contact) or when the virus travels on tiny droplets  
30 released into the air. That's why, in the beginning of the COVID-19 pandemic it was anticipated  
31 that SARS-CoV-2 transmission started with a sneeze or cough, similarly to SARS-CoV-1. Cough  
32 aerosols contain a mix of droplets and airborne particles. Droplets remain larger than 5-10  
33 micron while quickly falling to the ground. Airborne particles, formally called "droplet nuclei",  
34 originate from droplets that become so small while evaporating that they remain suspended in the  
35 air. The *World Health Organization* believes that SARS-CoV-2 normally does not transmit  
36 through droplet nuclei, only through droplets. Weather on droplets or droplet nuclei or a  
37 combination of both, a recent hospital study is suggestive for important SARS-CoV-2 transport  
38 through the air, demonstrated by high ratios of positive air and floor samples (1).  
39 We previously reported that surgical masks worn by cystic fibrosis patients while coughing, not  
40 only stop droplets, but also block the generation of droplet nuclei containing viable  
41 *Pseudomonas* (2). While a lot of air, if not most, escapes through the gaps between face and  
42 mask when coughing, the infectious particles did not (2-3). Our findings were confirmed by  
43 another group and very recently a study with seasonal coronaviruses reported similar pilot results  
44 (4-5). The behavior of virus-laden droplets and droplet nuclei in aerosols, depends on the  
45 aerodynamic size of these carrier particles, not on the size of the virus itself.  
46 We hypothesized that the SARS-CoV-2 route of transmission is a disease severity determinant  
47 and that most (more than 70%) patients with severe pulmonary COVID-19 were exposed to

48 cough aerosols. Based on this, one could expect a significant effect of mass masking on COVID-  
49 19 morbidity and mortality.

## 50 **Methods**

51 After explaining the COVID-19 incubation period, we asked one question to patients that were  
52 almost 100% certain which person infected them: “Was coughing a symptom of this person?”.  
53 Confidence intervals (CI) for proportions were calculated using MedCalc® (MedCalc Software,  
54 Ostend, Belgium). The study received a review exemption from the Ethics Committee of  
55 Antwerp University Hospital in Belgium.

## 56 **Results**

57 We received thirty-eight filled “ONE-questionnaires” between March 18 and April 17. Only 9  
58 out of 25 hospitalized patients requiring supplemental oxygen (36%; 95% CI 18-57%) got  
59 infected by somebody who coughed (Figure 1). This result does not support the hypothesis that  
60 exposure to cough aerosols is required (meaning observed in over 70% of the patients) to  
61 develop severe pulmonary COVID-19. Overall, only 14 out of 38 COVID-19 patients (37%;  
62 95% CI 22-54%) were infected by someone who had coughing as a symptom.

## 63 **Discussion**

64 Participating patients were only asked to answer one question, which was both a strength and a  
65 limitation of our study. As with any case-control study, there is a risk of recall bias and  
66 misclassification: patients may not remember coughing as a symptom of the person who infected  
67 them. Nevertheless, a lot of the transmission did not seem to involve coughing at all.  
68 Alternatively, other respiratory maneuvers like sneezing, talking or breathing could have  
69 generated SARS-CoV-2 aerosols. When talking, vibration of the vocal cords generates 2.5-  
70 micron droplet nuclei (6). Ten seconds saying “aah” produces a comparable number of droplet

71 nuclei as coughing for 10 seconds (7). The vocal cords are being lubricated by saliva, which  
72 contains large amounts of SARS-CoV-2 in most COVID-19 patients (8). During singing or  
73 talking with a loud voice, up to 50 times more droplet nuclei are being generated compared to  
74 talking with a quiet voice (9-10). Researchers also noticed that 1 in 5 people released 10 times  
75 more particles during talking than their peers for reasons not yet understood. Bringing all this  
76 information together, one could expect COVID-19 superspreader events in bars and clubs with  
77 loud music, choirs, and crowded markets. Lately these are increasingly being reported, in both  
78 non-scientific and scientific press. One could even argue that talking with a loud voice to hearing  
79 impaired elderly, could have contributed to the high COVID-19 incidence in nursing homes.  
80 Droplets have enough mass and speed to get impacted in a mask when coughing, even the small  
81 ones that would otherwise evaporate to droplet nuclei (2). Large droplets also impact in a mask  
82 during speech, but there is no guarantee that masks prevent small droplets from evaporating to  
83 droplet nuclei when just talking or breathing. According to Newton's second law of motion  
84 ( $F=m.a$ ), less force is required to deflect the slowly moving particles during speech or breathing,  
85 which could make it easier for them to follow airflows around the edge of a mask.  
86 After droplet or contact infection of the upper respiratory tract, SARS-CoV-2 could spread to the  
87 lower airways through a process of auto-inoculation, which is an alternative hypothesis for the  
88 pathogenesis of lung lesions in COVID-19 that would not involve direct inhalation of virus-laden  
89 particles. Another possible mechanism could involve hematogenous spread to the lungs.  
90 In conclusion, our study could not confirm that exposure to cough aerosols is required for  
91 developing severe pulmonary COVID-19. Further research is needed to look into transmission  
92 routes of SARS-CoV-2 and the preventive role of face masks or even "voice etiquette".  
93

94 **References**

- 95 1. Guo ZD, Wang ZY, Zhang SF, Li X, Li L, Li C, Cui Y, Fu RB, Dong YZ, Chi XY, Zhang  
96 MY, Liu K, Cao C, Liu B, Zhang K, Gao YW, Lu B, Chen W.  
97 Aerosol and Surface Distribution of Severe Acute Respiratory Syndrome Coronavirus 2 in Ho  
98 spital Wards, Wuhan, China, 2020. *Emerg Infect Dis.* 2020 Apr 10;26(7).
- 99 2. Vanden Driessche K, Hens N, Tilley P, Quon BS, Chilvers MA, de Groot R, Cotton MF,  
100 Marais BJ, Speert DP, Zlosnik JE. Surgical masks reduce airborne spread  
101 of *Pseudomonas aeruginosa* in colonized patients with cystic fibrosis. *Am J Respir Crit Care*  
102 *Med.* 2015 Oct 1;192(7):897-9.
- 103 3. Tang JW, Liebner TJ, Craven BA, Settles GS. A schlieren optical study of  
104 the human cough with and without wearing masks for aerosol infection control. *J R Soc*  
105 *Interface.* 2009 Dec 6;6 Suppl 6:S727-36.
- 106 4. Wood ME, Stockwell RE, Johnson GR, Ramsay KA, Sherrard LJ, Jabbour N, Ballard E,  
107 O'Rourke P, Kidd TJ, Wainwright CE, Knibbs LD, Sly PD, Morawska L, Bell SC.  
108 Face Masks and Cough Etiquette Reduce the Cough Aerosol Concentration  
109 of *Pseudomonas aeruginosa* in People with Cystic Fibrosis. *Am J Respir Crit Care Med.* 2018  
110 Feb 1;197(3):348-355.
- 111 5. Leung NHL, Chu DKW, Shiu EYC, Chan KH, McDevitt JJ, Hau BJP, Yen HL, Li Y, Ip  
112 DKM, Peiris JSM, Seto WH, Leung GM, Milton DK, Cowling BJ. Respiratory virus  
113 shedding in exhaled breath and efficacy of face masks. *Nat Med.* 2020 Apr 3. doi:  
114 10.1038/s41591-020-0843-2.

- 115 6. Johnson GR, Morawska L, Ristovski Z, Hargreaves M, Mengersen K, Chao CYH, Wan MP,  
116 Li Y, Xie X, Katoshevski D, Corbett S. Modality of human expired aerosol size  
117 distributions. *Journal of Aerosol Science* 42(12):839-851.
- 118 7. Morawska L, Johnson GR, Ristovski Z, Hargreaves M, Corbett S, Chao CYH, Li Y,  
119 Katoshevski D. Size distribution and sites of origin of droplets expelled from the human  
120 respiratory tract during expiratory activities. *Journal of Aerosol Science* 40(3):256-269
- 121 8. To KK, Tsang OT, Chik-Yan Yip C, Chan KH, Wu TC, Chan JMC, Leung WS, Chik TS,  
122 Choi CY, Kandamby DH, Lung DC, Tam AR, Poon RW, Fung AY, Hung IF, Cheng VC,  
123 Chan JF, Yuen KY. Consistent detection of 2019 novel coronavirus in saliva. *Clin Infect Dis*.  
124 2020 Feb 12.
- 125 9. Loudon RG, Roberts RM. Singing and the dissemination of tuberculosis. *Am Rev Respir*  
126 *Dis*. 1968 Aug;98(2):297-300.
- 127 10. Asadi S, Wexler AS, Cappa CD, Barreda S, Bouvier NM, Ristenpart WD.  
128 Aerosol emission and superemission during human speech increase with voice loudness. *Sci*  
129 *Rep*. 2019 Feb 20;9(1):2348.

130 Figure 1. Results of the ONE-questionnaire

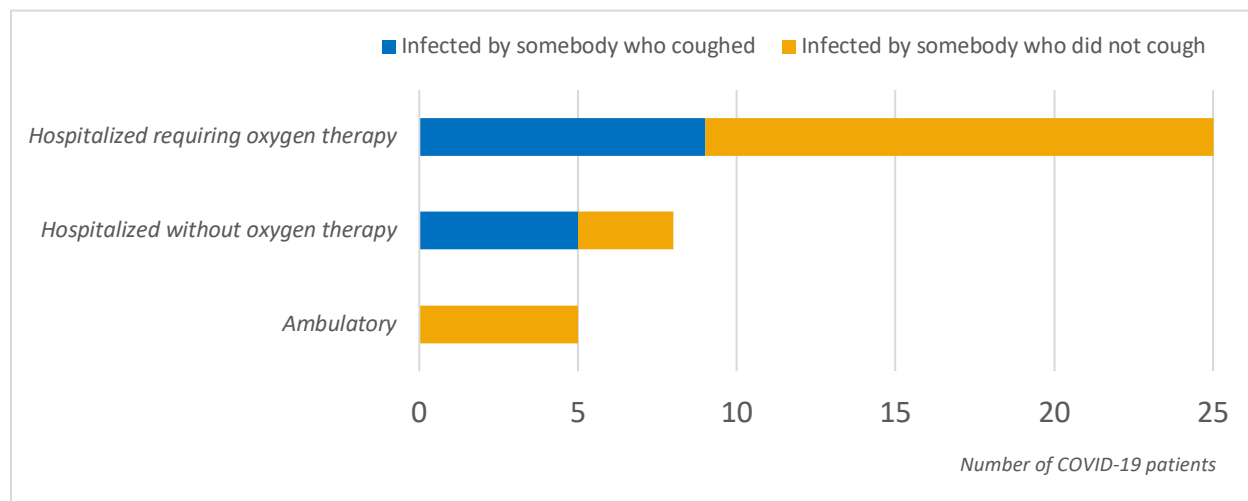

131
